# Supplementary material
Source: publisher figshare collection journal article supplement (https://acs.figshare.com/ndownloader/files/3917407)
Supplement: Supplementary file 1 [file 3917407]

data_General
_audit_creation_date                    2012-04-28
_audit_creation_method                 'by CrystalStructure 4.0'
_audit_update_record                    ?

#==============================================================================
# PROCESSING SUMMARY (IUCr Office Use Only)

_journal_date_recd_electronic           ?
_journal_date_from_coeditor             ?
_journal_date_accepted                  ?
_journal_coeditor_code                  ?

#==============================================================================
# SUBMISSION DETAILS

_publ_contact_author_name              'ENTER NAME'
_publ_contact_author_email             'ENTER EMAIL ADDRESS'
_publ_contact_author_fax               'ENTER FAX NUMBER'
_publ_contact_author_phone             'ENTER PHONE NUMBER'
_publ_contact_letter
;
    ENTER TEXT OF LETTER
;
_publ_requested_journal                'ENTER JOURNAL NAME HERE'
_publ_requested_category               'CHOOSE FI FM FO CI CM CO or AD'
_publ_requested_coeditor_name           ?

#==============================================================================
# TITLE AND AUTHOR LIST

_publ_section_title
;
    ENTER SECTION TITLE
;
_publ_section_title_footnote
;
    ENTER FOOTNOTE TO TITLE OF PAPER
;
loop_
_publ_author_name
_publ_author_footnote
_publ_author_address
' FIRST AUTHORS NAME '
;
  FIRST AUTHORS FOOTNOTES
;
;
  FIRST AUTHORS ADDRESS
;
_publ_section_synopsis
;
    ENTER SYNOPSIS
;

#==============================================================================
# TEXT

_publ_section_abstract
;
    ENTER ABSTRACT
;
_publ_section_comment
;
    ENTER TEXT
;
_publ_section_references
;
    ENTER OTHER REFERENCES

    Rigaku (2010). CrystalStructure. Version 4.0. 
    Rigaku Corporation, Tokyo, Japan.

    Altomare, A., Cascarano, G., Giacovazzo, C., Guagliardi, A., 
    Burla, M., Polidori, G., and Camalli, M. (1994) J. Appl. Cryst., 27, 435. 
    SIR92

    Carruthers, J.R., Rollett,J.S., Betteridge, P.W.,
	 Kinna, D., Pearce, L., Larsen, A., and Gabe, E.(1999)
    CRYSTALS Issue 11, Chemical Crystallography Laboratory, Oxford, UK.

    Rigaku (1995). ABSCOR. 
    Rigaku Corporation, Tokyo, Japan.

;
_publ_section_figure_captions
;
    ENTER FIGURE CAPTIONS
;
_publ_section_exptl_prep
;
    ENTER COMPOUND PREPARATION DETAILS
;
_publ_section_exptl_refinement
;
    ENTER SPECIAL DETAILS OF THE REFINEMENT
;

#==============================================================================
data_120427-2

#==============================================================================
# CHEMICAL DATA

_chemical_formula_sum                  'C12 H16 N2 O3 S'
_chemical_formula_moiety               'C12 H16 N2 O3 S'
_chemical_formula_weight                268.33
_chemical_melting_point                 ?
_chemical_absolute_configuration       'CHOOSE rm ad rmad syn or unk'

#==============================================================================
# CRYSTAL DATA
_symmetry_cell_setting                  orthorhombic
_symmetry_space_group_name_H-M         'P 21 21 21'
_symmetry_space_group_name_Hall        'P 2ac 2ab'
_symmetry_Int_Tables_number             19
loop_
_symmetry_equiv_pos_site_id
_symmetry_equiv_pos_as_xyz
1   '+X,+Y,+Z'
2   '1/2+X,1/2-Y,-Z'
3   '-X,1/2+Y,1/2-Z'
4   '1/2-X,-Y,1/2+Z'
#------------------------------------------------------------------------------
_cell_length_a                          6.55092(12)
_cell_length_b                          8.59104(16)
_cell_length_c                          23.0273(5)
_cell_angle_alpha                       90.0000
_cell_angle_beta                        90.0000
_cell_angle_gamma                       90.0000
_cell_volume                            1295.96(5)
_cell_formula_units_Z                   4
_cell_measurement_reflns_used           10896
_cell_measurement_theta_min             3.84
_cell_measurement_theta_max             68.25
_cell_measurement_temperature           173
#------------------------------------------------------------------------------
_exptl_crystal_description              block
_exptl_crystal_colour                   colorless
_exptl_crystal_size_max                 0.250
_exptl_crystal_size_mid                 0.200
_exptl_crystal_size_min                 0.100
_exptl_crystal_density_diffrn           1.375
_exptl_crystal_density_meas             ?
_exptl_crystal_density_method          'not measured'
_exptl_crystal_F_000                    568.00
_exptl_absorpt_coefficient_mu           2.259
_exptl_absorpt_correction_type          multi-scan
_exptl_absorpt_process_details         'ABSCOR (Rigaku, 1995)'
_exptl_absorpt_correction_T_min         0.641
_exptl_absorpt_correction_T_max         0.798

#==============================================================================
# EXPERIMENTAL DATA

_diffrn_ambient_temperature             173
_diffrn_radiation_type                 'Cu K\a'
_diffrn_radiation_wavelength            1.54187
_diffrn_measurement_device_type        'Rigaku R-AXIS RAPID'
_diffrn_measurement_method              \w
_diffrn_detector_area_resol_mean        10.000
_diffrn_reflns_number                   13308
_diffrn_reflns_av_R_equivalents         0.0407
_diffrn_reflns_theta_max                68.25
_diffrn_reflns_theta_full               68.26
_diffrn_measured_fraction_theta_max     1.000
_diffrn_measured_fraction_theta_full    1.000
_diffrn_reflns_limit_h_min             -7
_diffrn_reflns_limit_h_max              7
_diffrn_reflns_limit_k_min             -10
_diffrn_reflns_limit_k_max              10
_diffrn_reflns_limit_l_min             -27
_diffrn_reflns_limit_l_max              26
_diffrn_standards_number                0
_diffrn_standards_interval_count        .
_diffrn_standards_decay_%               ?

#==============================================================================
# REFINEMENT DATA

_refine_special_details
;
    Refinement was performed using all reflections. The weighted 
    R-factor (wR) and goodness of fit (S) are based on F^2^.
    R-factor (gt) are based on F. The threshold expression of
    F^2^ > 2.0 sigma(F^2^) is used only for calculating R-factor (gt).
;
_reflns_number_total                    2364
_reflns_number_gt                       2244
_reflns_threshold_expression            F^2^>2.0\s(F^2^)
_refine_ls_structure_factor_coef        Fsqd
_refine_ls_R_factor_gt                  0.0330
_refine_ls_wR_factor_ref                0.0881
_refine_ls_number_restraints            ?
_refine_ls_hydrogen_treatment           mixed
_refine_ls_number_reflns                2364
_refine_ls_number_parameters            219
_refine_ls_goodness_of_fit_ref          1.050
_refine_ls_weighting_scheme             calc
_refine_ls_weighting_details
                               'w = 1/[0.0010Fo^2^ + 1.0000\s(Fo^2^)]/(4Fo^2^)'
_atom_sites_solution_hydrogens          geom
_atom_sites_solution_primary            direct
_atom_sites_solution_secondary          difmap
_refine_ls_shift/su_max                 0.009
_refine_diff_density_max                0.545
_refine_diff_density_min               -0.546
_refine_ls_extinction_method            none
_refine_ls_extinction_coef              ?
_refine_ls_abs_structure_details
            'Flack, H. D. (1983), Acta Cryst. A39, 876-881.  963 Friedel Pairs'
_refine_ls_abs_structure_Flack         -0.006(19)

loop_
_atom_type_symbol
_atom_type_description
_atom_type_scat_dispersion_real
_atom_type_scat_dispersion_imag
_atom_type_scat_source
  'C' 'C'  0.0181 0.0091 
;
International Tables for Crystallography
(1992, Vol. C, Tables 4.2.6.8 and 6.1.1.4)
;
  'H' 'H'  0.0000 0.0000 
;
International Tables for Crystallography
(1992, Vol. C, Table 6.1.1.4)
;
  'O' 'O'  0.0492 0.0322 
;
International Tables for Crystallography
(1992, Vol. C, Tables 4.2.6.8 and 6.1.1.4)
;
  'N' 'N'  0.0311 0.0180 
;
International Tables for Crystallography
(1992, Vol. C, Tables 4.2.6.8 and 6.1.1.4)
;
  'S' 'S'  0.3331 0.5567 
;
International Tables for Crystallography
(1992, Vol. C, Tables 4.2.6.8 and 6.1.1.4)
;

#==============================================================================
# ATOMIC COORDINATES AND THERMAL PARAMETERS

loop_
_atom_site_label
_atom_site_type_symbol
_atom_site_fract_x
_atom_site_fract_y
_atom_site_fract_z
_atom_site_U_iso_or_equiv
_atom_site_adp_type
_atom_site_occupancy
_atom_site_symmetry_multiplicity
_atom_site_calc_flag
_atom_site_refinement_flags
_atom_site_disorder_assembly
_atom_site_disorder_group
 S1 S 0.25561(7) 1.04366(5) 0.21972(2) 0.02410(12) Uani 1.0 4 d . . .
 O1 O 0.6354(3) 1.29718(17) 0.09404(6) 0.0382(4) Uani 1.0 4 d . . .
 O2 O 0.3647(3) 1.18383(18) 0.23180(7) 0.0443(5) Uani 1.0 4 d . . .
 O3 O 0.0470(3) 1.05466(19) 0.20154(6) 0.0377(5) Uani 1.0 4 d . . .
 N1 N 0.3575(3) 1.14994(18) 0.07485(7) 0.0265(5) Uani 1.0 4 d . . .
 N2 N 0.3766(3) 0.94461(19) 0.16960(6) 0.0236(4) Uani 1.0 4 d . . .
 C1 C 0.5560(4) 1.1695(3) 0.09230(8) 0.0263(5) Uani 1.0 4 d . . .
 C2 C 0.6699(4) 1.0227(3) 0.10770(8) 0.0284(6) Uani 1.0 4 d . . .
 C3 C 0.6004(3) 0.9539(3) 0.16582(9) 0.0275(6) Uani 1.0 4 d . . .
 C4 C 0.2667(4) 0.8983(2) 0.11817(7) 0.0224(5) Uani 1.0 4 d . . .
 C5 C 0.1731(4) 0.7534(3) 0.11554(8) 0.0273(5) Uani 1.0 4 d . . .
 C6 C 0.0649(4) 0.7146(3) 0.06548(9) 0.0305(6) Uani 1.0 4 d . . .
 C7 C 0.0541(4) 0.8170(3) 0.01920(8) 0.0293(6) Uani 1.0 4 d . . .
 C8 C 0.1528(3) 0.9597(3) 0.02099(8) 0.0256(5) Uani 1.0 4 d . . .
 C9 C 0.2613(4) 1.00147(19) 0.07105(7) 0.0224(5) Uani 1.0 4 d . . .
 C10 C 0.1856(5) 0.6425(3) 0.16603(10) 0.0403(7) Uani 1.0 4 d . . .
 C11 C 0.2381(5) 1.2879(3) 0.05869(9) 0.0393(6) Uani 1.0 4 d . . .
 C12 C 0.2718(5) 0.9283(3) 0.28271(8) 0.0381(7) Uani 1.0 4 d . . .
 H1 H 0.641(4) 0.939(3) 0.0800(10) 0.027(6) Uiso 1.0 4 d . . .
 H2 H 0.809(4) 1.038(3) 0.1104(8) 0.012(5) Uiso 1.0 4 d . . .
 H3 H 0.657(4) 0.856(3) 0.1717(10) 0.028(6) Uiso 1.0 4 d . . .
 H4 H 0.634(4) 1.012(3) 0.1951(11) 0.035(7) Uiso 1.0 4 d . . .
 H5 H 0.003(4) 0.623(3) 0.0649(10) 0.032(6) Uiso 1.0 4 d . . .
 H6 H -0.022(4) 0.786(3) -0.0145(10) 0.023(6) Uiso 1.0 4 d . . .
 H7 H 0.147(4) 1.036(3) -0.0106(9) 0.024(6) Uiso 1.0 4 d . . .
 H8 H 0.095(5) 0.676(3) 0.1985(11) 0.044(8) Uiso 1.0 4 d . . .
 H9 H 0.129(5) 0.537(4) 0.1587(13) 0.054(8) Uiso 1.0 4 d . . .
 H10 H 0.333(5) 0.637(4) 0.1787(12) 0.054(8) Uiso 1.0 4 d . . .
 H11 H 0.0951 1.2697 0.0648 0.0475 Uiso 1.0 4 calc R . .
 H12 H 0.2618 1.3109 0.0185 0.0477 Uiso 1.0 4 calc R . .
 H13 H 0.2816 1.3743 0.0820 0.0476 Uiso 1.0 4 calc R . .
 H14 H 0.218(4) 0.984(3) 0.3128(11) 0.041(7) Uiso 1.0 4 d . . .
 H15 H 0.399(5) 0.900(3) 0.2867(11) 0.035(7) Uiso 1.0 4 d . . .
 H16 H 0.184(5) 0.840(3) 0.2793(12) 0.044(7) Uiso 1.0 4 d . . .


loop_
_atom_site_aniso_label
_atom_site_aniso_U_11
_atom_site_aniso_U_22
_atom_site_aniso_U_33
_atom_site_aniso_U_12
_atom_site_aniso_U_13
_atom_site_aniso_U_23
 S1 0.0243(3) 0.0290(3) 0.0190(3) 0.0020(3) -0.00105(19) -0.00164(14)
 O1 0.0517(10) 0.0341(8) 0.0286(7) -0.0143(8) -0.0050(7) 0.0051(6)
 O2 0.0523(11) 0.0387(8) 0.0418(9) -0.0093(8) 0.0021(8) -0.0132(7)
 O3 0.0273(9) 0.0560(10) 0.0299(7) 0.0121(8) -0.0015(6) -0.0075(7)
 N1 0.0298(10) 0.0239(8) 0.0257(8) 0.0015(7) 0.0010(7) 0.0006(7)
 N2 0.0196(9) 0.0316(9) 0.0195(8) -0.0009(7) -0.0002(6) -0.0001(7)
 C1 0.0305(12) 0.0331(10) 0.0154(8) -0.0064(9) 0.0022(8) 0.0002(7)
 C2 0.0208(11) 0.0403(12) 0.0243(9) -0.0027(9) 0.0014(8) -0.0007(9)
 C3 0.0192(11) 0.0376(11) 0.0258(10) 0.0003(10) -0.0019(8) 0.0018(9)
 C4 0.0191(10) 0.0294(9) 0.0186(8) 0.0015(9) 0.0007(8) -0.0025(7)
 C5 0.0225(11) 0.0307(10) 0.0288(10) 0.0012(9) 0.0031(8) -0.0022(8)
 C6 0.0259(12) 0.0284(11) 0.0372(11) -0.0043(9) 0.0029(9) -0.0064(9)
 C7 0.0220(12) 0.0408(12) 0.0251(10) 0.0016(10) -0.0035(9) -0.0103(9)
 C8 0.0231(11) 0.0307(10) 0.0231(9) 0.0068(9) -0.0003(8) -0.0040(8)
 C9 0.0201(10) 0.0243(8) 0.0229(8) 0.0012(8) 0.0022(8) -0.0024(7)
 C10 0.0495(16) 0.0360(12) 0.0355(12) -0.0135(11) 0.0010(11) 0.0074(10)
 C11 0.0477(15) 0.0294(10) 0.0408(11) 0.0063(12) -0.0096(12) 0.0027(8)
 C12 0.0460(15) 0.0484(13) 0.0199(10) 0.0131(13) 0.0039(11) 0.0049(8)

#==============================================================================
_computing_data_collection             'RAPID AUTO (Rigaku, ????)'
_computing_cell_refinement             'RAPID AUTO'
_computing_data_reduction              'RAPID AUTO'
_computing_structure_solution          'SIR92 (Altomare, et al., 1994)'
_computing_structure_refinement        'CRYSTALS (Carruthers, et al., 1999)'
_computing_publication_material        'CrystalStructure 4.0 (Rigaku, 2010)'
_computing_molecular_graphics          'CrystalStructure 4.0'

#==============================================================================
# MOLECULAR GEOMETRY

_geom_special_details
;
    ENTER SPECIAL DETAILS OF THE MOLECULAR GEOMETRY
;

loop_
_geom_bond_atom_site_label_1
_geom_bond_atom_site_label_2
_geom_bond_distance
_geom_bond_publ_flag
_geom_bond_site_symmetry_1
_geom_bond_site_symmetry_2
S1 O2 1.4278(17) yes . .
S1 O3 1.4322(17) yes . .
S1 N2 1.6383(16) yes . .
S1 C12 1.760(3) yes . .
O1 C1 1.215(3) yes . .
N1 C1 1.371(3) yes . .
N1 C9 1.426(3) yes . .
N1 C11 1.468(3) yes . .
N2 C3 1.471(3) yes . .
N2 C4 1.442(3) yes . .
C1 C2 1.508(3) yes . .
C2 C3 1.532(3) yes . .
C4 C5 1.389(3) yes . .
C4 C9 1.402(3) yes . .
C5 C6 1.394(3) yes . .
C5 C10 1.505(3) yes . .
C6 C7 1.384(3) yes . .
C7 C8 1.387(3) yes . .
C8 C9 1.401(3) yes . .
C2 H1 0.98(3) no . .
C2 H2 0.92(3) no . .
C3 H3 0.93(3) no . .
C3 H4 0.87(3) no . .
C6 H5 0.88(3) no . .
C7 H6 0.96(3) no . .
C8 H7 0.98(2) no . .
C10 H8 1.00(3) no . .
C10 H9 1.00(3) no . .
C10 H10 1.01(4) no . .
C11 H11 0.960 no . .
C11 H12 0.960 no . .
C11 H13 0.960 no . .
C12 H14 0.92(3) no . .
C12 H15 0.88(3) no . .
C12 H16 0.96(3) no . .

loop_
_geom_angle_atom_site_label_1
_geom_angle_atom_site_label_2
_geom_angle_atom_site_label_3
_geom_angle
_geom_angle_publ_flag
_geom_angle_site_symmetry_1
_geom_angle_site_symmetry_2
_geom_angle_site_symmetry_3
O2 S1 O3 118.62(10) yes . . .
O2 S1 N2 109.46(10) yes . . .
O2 S1 C12 106.51(11) yes . . .
O3 S1 N2 106.85(9) yes . . .
O3 S1 C12 109.61(12) yes . . .
N2 S1 C12 105.00(11) yes . . .
C1 N1 C9 123.16(17) yes . . .
C1 N1 C11 118.76(18) yes . . .
C9 N1 C11 118.08(18) yes . . .
S1 N2 C3 119.71(13) yes . . .
S1 N2 C4 118.71(13) yes . . .
C3 N2 C4 117.65(15) yes . . .
O1 C1 N1 121.76(19) yes . . .
O1 C1 C2 122.4(2) yes . . .
N1 C1 C2 115.85(18) yes . . .
C1 C2 C3 112.38(18) yes . . .
N2 C3 C2 111.65(17) yes . . .
N2 C4 C5 120.24(16) yes . . .
N2 C4 C9 118.28(16) yes . . .
C5 C4 C9 121.47(17) yes . . .
C4 C5 C6 118.34(18) yes . . .
C4 C5 C10 120.62(18) yes . . .
C6 C5 C10 121.03(19) yes . . .
C5 C6 C7 120.7(2) yes . . .
C6 C7 C8 121.03(19) yes . . .
C7 C8 C9 119.16(17) yes . . .
N1 C9 C4 120.48(16) yes . . .
N1 C9 C8 120.26(16) yes . . .
C4 C9 C8 119.21(17) yes . . .
C1 C2 H1 111.3(13) no . . .
C1 C2 H2 112.6(13) no . . .
C3 C2 H1 103.2(13) no . . .
C3 C2 H2 106.9(12) no . . .
H1 C2 H2 110.0(18) no . . .
N2 C3 H3 109.9(15) no . . .
N2 C3 H4 103.8(17) no . . .
C2 C3 H3 110.8(14) no . . .
C2 C3 H4 112.4(17) no . . .
H3 C3 H4 108(3) no . . .
C5 C6 H5 117.4(15) no . . .
C7 C6 H5 121.8(15) no . . .
C6 C7 H6 118.4(13) no . . .
C8 C7 H6 120.5(12) no . . .
C7 C8 H7 123.4(12) no . . .
C9 C8 H7 117.4(12) no . . .
C5 C10 H8 111.2(15) no . . .
C5 C10 H9 115.3(17) no . . .
C5 C10 H10 107.8(17) no . . .
H8 C10 H9 100(3) no . . .
H8 C10 H10 112(3) no . . .
H9 C10 H10 111(3) no . . .
N1 C11 H11 110.616 no . . .
N1 C11 H12 108.969 no . . .
N1 C11 H13 108.908 no . . .
H11 C11 H12 109.440 no . . .
H11 C11 H13 109.445 no . . .
H12 C11 H13 109.444 no . . .
S1 C12 H14 107.8(15) no . . .
S1 C12 H15 107.6(17) no . . .
S1 C12 H16 110.1(16) no . . .
H14 C12 H15 116(3) no . . .
H14 C12 H16 104(3) no . . .
H15 C12 H16 111(3) no . . .

loop_
_geom_torsion_atom_site_label_1
_geom_torsion_atom_site_label_2
_geom_torsion_atom_site_label_3
_geom_torsion_atom_site_label_4
_geom_torsion
_geom_torsion_publ_flag
_geom_torsion_site_symmetry_1
_geom_torsion_site_symmetry_2
_geom_torsion_site_symmetry_3
_geom_torsion_site_symmetry_4
O2 S1 N2 C3 31.48(14) no . . . .
O2 S1 N2 C4 -125.72(12) no . . . .
O3 S1 N2 C3 161.10(11) no . . . .
O3 S1 N2 C4 3.91(14) no . . . .
C12 S1 N2 C3 -82.52(15) no . . . .
C12 S1 N2 C4 120.28(14) no . . . .
C1 N1 C9 C4 51.3(3) no . . . .
C1 N1 C9 C8 -131.37(19) no . . . .
C9 N1 C1 O1 178.52(16) no . . . .
C9 N1 C1 C2 -0.1(3) no . . . .
C11 N1 C1 O1 -0.9(3) no . . . .
C11 N1 C1 C2 -179.46(15) no . . . .
C11 N1 C9 C4 -129.29(19) no . . . .
C11 N1 C9 C8 48.0(3) no . . . .
S1 N2 C3 C2 -117.76(14) no . . . .
S1 N2 C4 C5 -93.09(18) no . . . .
S1 N2 C4 C9 88.29(18) no . . . .
C3 N2 C4 C5 109.2(2) no . . . .
C3 N2 C4 C9 -69.4(3) no . . . .
C4 N2 C3 C2 39.7(3) no . . . .
O1 C1 C2 C3 108.1(2) no . . . .
N1 C1 C2 C3 -73.3(2) no . . . .
C1 C2 C3 N2 48.0(3) no . . . .
N2 C4 C5 C6 178.69(16) no . . . .
N2 C4 C5 C10 -0.3(3) no . . . .
N2 C4 C9 N1 -1.7(3) no . . . .
N2 C4 C9 C8 -179.05(15) no . . . .
C5 C4 C9 N1 179.68(17) no . . . .
C5 C4 C9 C8 2.3(3) no . . . .
C9 C4 C5 C6 -2.7(3) no . . . .
C9 C4 C5 C10 178.31(17) no . . . .
C4 C5 C6 C7 1.1(3) no . . . .
C10 C5 C6 C7 -179.97(19) no . . . .
C5 C6 C7 C8 1.0(4) no . . . .
C6 C7 C8 C9 -1.4(3) no . . . .
C7 C8 C9 N1 -177.61(17) no . . . .
C7 C8 C9 C4 -0.3(3) no . . . .

loop_
_geom_contact_atom_site_label_1
_geom_contact_atom_site_label_2
_geom_contact_distance
_geom_contact_publ_flag
_geom_contact_site_symmetry_1
_geom_contact_site_symmetry_2
S1 N1 3.5225(17) no . .
S1 C5 3.502(2) no . .
S1 C9 3.4428(17) no . .
O1 C3 3.389(3) no . .
O1 C9 3.570(3) no . .
O1 C11 2.728(4) no . .
O2 C1 3.450(3) no . .
O2 C3 2.931(3) no . .
O3 C4 2.750(3) no . .
O3 C5 3.362(3) no . .
O3 C9 3.348(3) no . .
N1 N2 2.808(3) no . .
N1 C3 3.123(3) no . .
N2 C1 2.878(3) no . .
N2 C10 2.882(3) no . .
C1 C4 3.062(3) no . .
C1 C8 3.594(3) no . .
C2 C4 2.860(3) no . .
C2 C9 2.813(3) no . .
C3 C5 3.485(3) no . .
C3 C9 3.141(3) no . .
C3 C12 3.453(4) no . .
C4 C7 2.761(3) no . .
C5 C8 2.811(3) no . .
C6 C9 2.783(3) no . .
C8 C11 3.002(3) no . .
O1 C8 3.375(3) no . 2_575
O1 C12 3.113(3) no . 3_655
O2 C3 3.316(3) no . 3_655
O2 C12 3.192(4) no . 3_655
O3 C2 3.294(3) no . 1_455
O3 C3 3.160(3) no . 1_455
O3 C10 3.492(3) no . 3_555
C2 O3 3.294(3) no . 1_655
C3 O2 3.316(3) no . 3_645
C3 O3 3.160(3) no . 1_655
C7 C7 3.583(3) no . 2_465
C7 C7 3.583(3) no . 2_565
C8 O1 3.375(3) no . 2_475
C10 O3 3.492(3) no . 3_545
C12 O1 3.113(3) no . 3_645
C12 O2 3.192(4) no . 3_645
S1 H3 3.28(3) no . .
S1 H4 2.56(3) no . .
S1 H8 3.36(3) no . .
O1 H1 3.09(3) no . .
O1 H2 2.53(2) no . .
O1 H4 3.38(3) no . .
O1 H12 3.0058 no . .
O1 H13 2.4265 no . .
O2 H4 2.45(3) no . .
O2 H14 2.71(3) no . .
O2 H15 2.76(3) no . .
O2 H16 3.37(3) no . .
O3 H8 3.27(3) no . .
O3 H14 2.86(3) no . .
O3 H15 3.31(3) no . .
O3 H16 2.72(3) no . .
N1 H1 2.60(3) no . .
N1 H2 3.22(3) no . .
N1 H4 3.51(3) no . .
N1 H7 2.60(2) no . .
N2 H1 2.69(3) no . .
N2 H2 3.25(2) no . .
N2 H8 3.03(3) no . .
N2 H10 2.67(3) no . .
N2 H14 3.47(3) no . .
N2 H15 2.73(3) no . .
N2 H16 2.96(3) no . .
C1 H3 3.32(3) no . .
C1 H4 2.77(3) no . .
C1 H11 3.2029 no . .
C1 H12 2.8431 no . .
C1 H13 2.5266 no . .
C3 H10 3.25(3) no . .
C3 H15 3.11(3) no . .
C4 H1 2.63(3) no . .
C4 H3 2.86(3) no . .
C4 H4 3.14(3) no . .
C4 H5 3.17(3) no . .
C4 H7 3.29(2) no . .
C4 H8 2.89(3) no . .
C4 H9 3.37(3) no . .
C4 H10 2.68(3) no . .
C4 H11 3.5997 no . .
C5 H1 3.55(3) no . .
C5 H3 3.54(3) no . .
C5 H6 3.27(3) no . .
C6 H7 3.31(2) no . .
C6 H8 3.09(3) no . .
C6 H9 2.67(3) no . .
C6 H10 3.21(3) no . .
C8 H1 3.48(3) no . .
C8 H5 3.21(3) no . .
C8 H11 2.8730 no . .
C8 H12 3.1010 no . .
C9 H1 2.55(3) no . .
C9 H6 3.28(3) no . .
C9 H11 2.5530 no . .
C9 H12 2.9214 no . .
C9 H13 3.2157 no . .
C10 H3 3.59(3) no . .
C10 H5 2.63(3) no . .
C10 H16 3.11(3) no . .
C11 H7 2.75(2) no . .
C12 H4 3.20(3) no . .
C12 H8 3.13(3) no . .
C12 H10 3.49(3) no . .
H1 H3 2.23(4) no . .
H1 H4 2.72(4) no . .
H2 H3 2.33(3) no . .
H2 H4 2.27(4) no . .
H3 H10 2.84(4) no . .
H3 H15 3.17(4) no . .
H4 H15 2.78(4) no . .
H5 H6 2.31(3) no . .
H5 H8 3.17(4) no . .
H5 H9 2.43(4) no . .
H5 H10 3.40(4) no . .
H6 H7 2.41(3) no . .
H7 H11 2.6772 no . .
H7 H12 2.5681 no . .
H8 H15 3.43(4) no . .
H8 H16 2.40(4) no . .
H10 H15 3.39(4) no . .
H10 H16 3.06(4) no . .
S1 H8 3.18(3) no . 3_555
O1 H7 2.40(2) no . 2_575
O1 H11 3.0946 no . 1_655
O1 H12 2.8738 no . 2_575
O1 H14 2.85(3) no . 3_655
O1 H15 2.89(3) no . 3_655
O1 H16 3.17(3) no . 3_655
O2 H3 2.67(3) no . 3_655
O2 H4 3.28(3) no . 3_655
O2 H8 3.41(3) no . 3_555
O2 H10 2.89(3) no . 3_655
O2 H15 2.45(3) no . 3_655
O2 H16 3.26(3) no . 3_655
O3 H2 2.62(2) no . 1_455
O3 H3 3.15(3) no . 1_455
O3 H4 2.73(3) no . 1_455
O3 H8 2.69(3) no . 3_555
O3 H9 3.42(3) no . 3_555
O3 H16 2.91(3) no . 3_555
N1 H12 3.4266 no . 2_575
C1 H7 3.21(2) no . 2_575
C1 H12 2.8898 no . 2_575
C1 H15 3.43(3) no . 3_655
C2 H12 3.2932 no . 2_575
C4 H2 3.23(3) no . 1_455
C4 H6 3.18(3) no . 2_565
C5 H2 3.42(2) no . 1_455
C5 H6 3.09(3) no . 2_565
C5 H13 3.4214 no . 1_545
C6 H1 3.40(3) no . 1_455
C6 H2 3.41(2) no . 1_455
C6 H6 2.95(3) no . 2_565
C6 H13 3.2722 no . 1_545
C7 H1 3.22(3) no . 1_455
C7 H1 3.22(3) no . 2_465
C7 H2 3.25(2) no . 1_455
C7 H5 3.56(3) no . 2_565
C7 H6 2.92(3) no . 2_565
C8 H2 3.12(2) no . 1_455
C8 H5 3.11(3) no . 2_565
C8 H6 3.01(2) no . 2_565
C8 H12 3.3568 no . 2_475
C9 H2 3.11(3) no . 1_455
C9 H6 3.14(2) no . 2_565
C10 H4 3.59(3) no . 3_645
C10 H13 3.0733 no . 1_545
C10 H14 3.01(3) no . 3_545
C10 H15 3.60(3) no . 3_645
C11 H5 3.27(3) no . 1_565
C11 H7 3.27(2) no . 2_575
C11 H9 3.22(3) no . 1_565
C12 H8 3.24(3) no . 3_555
C12 H9 3.10(3) no . 3_555
C12 H10 3.27(3) no . 3_655
H1 C6 3.40(3) no . 1_655
H1 C7 3.22(3) no . 1_655
H1 C7 3.22(3) no . 2_565
H1 H5 3.50(3) no . 2_565
H1 H6 3.37(3) no . 1_655
H1 H6 2.68(3) no . 2_565
H1 H12 3.2220 no . 2_575
H2 O3 2.62(2) no . 1_655
H2 C4 3.23(3) no . 1_655
H2 C5 3.42(2) no . 1_655
H2 C6 3.41(2) no . 1_655
H2 C7 3.25(2) no . 1_655
H2 C8 3.12(2) no . 1_655
H2 C9 3.11(3) no . 1_655
H2 H7 3.56(3) no . 1_655
H2 H11 2.9275 no . 1_655
H2 H12 3.2525 no . 2_575
H3 O2 2.67(3) no . 3_645
H3 O3 3.15(3) no . 1_655
H3 H8 3.31(4) no . 1_655
H3 H14 3.31(4) no . 3_645
H4 O2 3.28(3) no . 3_645
H4 O3 2.73(3) no . 1_655
H4 C10 3.59(3) no . 3_655
H4 H8 3.34(4) no . 3_655
H4 H10 3.11(4) no . 3_655
H4 H15 3.36(4) no . 3_655
H4 H16 3.12(4) no . 3_655
H5 C7 3.56(3) no . 2_465
H5 C8 3.11(3) no . 2_465
H5 C11 3.27(3) no . 1_545
H5 H1 3.50(3) no . 2_465
H5 H6 3.41(4) no . 2_565
H5 H7 2.98(4) no . 2_465
H5 H11 3.0985 no . 1_545
H5 H12 3.3517 no . 1_545
H5 H13 2.8425 no . 1_545
H5 H14 3.38(4) no . 3_545
H6 C4 3.18(3) no . 2_465
H6 C5 3.09(3) no . 2_465
H6 C6 2.95(3) no . 2_465
H6 C7 2.92(3) no . 2_465
H6 C8 3.01(2) no . 2_465
H6 C9 3.14(2) no . 2_465
H6 H1 3.37(3) no . 1_455
H6 H1 2.68(3) no . 2_465
H6 H5 3.41(4) no . 2_465
H6 H6 3.40(3) no . 2_465
H6 H6 3.40(3) no . 2_565
H6 H7 3.57(3) no . 2_465
H6 H13 3.5453 no . 2_475
H7 O1 2.40(2) no . 2_475
H7 C1 3.21(2) no . 2_475
H7 C11 3.27(2) no . 2_475
H7 H2 3.56(3) no . 1_455
H7 H5 2.98(4) no . 2_565
H7 H6 3.57(3) no . 2_565
H7 H12 2.8509 no . 2_475
H7 H13 3.0040 no . 2_475
H8 S1 3.18(3) no . 3_545
H8 O2 3.41(3) no . 3_545
H8 O3 2.69(3) no . 3_545
H8 C12 3.24(3) no . 3_545
H8 H3 3.31(4) no . 1_455
H8 H4 3.34(4) no . 3_645
H8 H14 2.64(4) no . 3_545
H8 H16 3.46(4) no . 3_545
H9 O3 3.42(3) no . 3_545
H9 C11 3.22(3) no . 1_545
H9 C12 3.10(3) no . 3_545
H9 H11 3.1585 no . 1_545
H9 H13 2.4604 no . 1_545
H9 H14 2.41(4) no . 3_545
H9 H15 3.53(4) no . 3_645
H9 H16 3.02(4) no . 3_545
H10 O2 2.89(3) no . 3_645
H10 C12 3.27(3) no . 3_645
H10 H4 3.11(4) no . 3_645
H10 H13 3.1861 no . 1_545
H10 H14 3.23(4) no . 3_645
H10 H15 2.80(4) no . 3_645
H11 O1 3.0946 no . 1_455
H11 H2 2.9275 no . 1_455
H11 H5 3.0985 no . 1_565
H11 H9 3.1585 no . 1_565
H11 H12 2.9875 no . 2_475
H12 O1 2.8738 no . 2_475
H12 N1 3.4266 no . 2_475
H12 C1 2.8898 no . 2_475
H12 C2 3.2932 no . 2_475
H12 C8 3.3568 no . 2_575
H12 H1 3.2220 no . 2_475
H12 H2 3.2525 no . 2_475
H12 H5 3.3517 no . 1_565
H12 H7 2.8509 no . 2_575
H12 H11 2.9875 no . 2_575
H12 H12 3.5422 no . 2_475
H12 H12 3.5422 no . 2_575
H13 C5 3.4214 no . 1_565
H13 C6 3.2722 no . 1_565
H13 C10 3.0733 no . 1_565
H13 H5 2.8425 no . 1_565
H13 H6 3.5453 no . 2_575
H13 H7 3.0040 no . 2_575
H13 H9 2.4604 no . 1_565
H13 H10 3.1861 no . 1_565
H14 O1 2.85(3) no . 3_645
H14 C10 3.01(3) no . 3_555
H14 H3 3.31(4) no . 3_655
H14 H5 3.38(4) no . 3_555
H14 H8 2.64(4) no . 3_555
H14 H9 2.41(4) no . 3_555
H14 H10 3.23(4) no . 3_655
H15 O1 2.89(3) no . 3_645
H15 O2 2.45(3) no . 3_645
H15 C1 3.43(3) no . 3_645
H15 C10 3.60(3) no . 3_655
H15 H4 3.36(4) no . 3_645
H15 H9 3.53(4) no . 3_655
H15 H10 2.80(4) no . 3_655
H16 O1 3.17(3) no . 3_645
H16 O2 3.26(3) no . 3_645
H16 O3 2.91(3) no . 3_545
H16 H4 3.12(4) no . 3_645
H16 H8 3.46(4) no . 3_555
H16 H9 3.02(4) no . 3_555

#==============================================================================

#==============================================================================
# Additional structures and associated data_? identifiers
# should be added at this point if there is more than one 
# structure analysis in the CIF.

#==============================================================================
#     End of CIF
#==============================================================================
